# Supplementary material
Source: PubMed Central journal article supplement (PMC3220453)
Supplement: supp_M111.232801_jbc.M111.232801-1.pdf [file supp_M111.232801_jbc.M111.232801-1.pdf]

## SUPPLEMENTAL FIGURE LEGENDS

**Figure.S1: Viability in stable INS1E clones.** Apoptosis was measured by annexin V-FITC plus PI staining and FACS analysis. Bars show the percentages of cells that were viable (Annexin<sup>-</sup>/PI<sup>-</sup>), early apoptotic (Annexin<sup>+</sup>/PI<sup>-</sup>) or late apoptotic/dead (Annexin<sup>+</sup>/PI<sup>+</sup>) (n= 3). Results are expressed as mean ± SEM.

**Figure.S2: mRNA levels of mitochondrial, K<sub>ATP</sub> channels and ER stress related genes in stable INS1E clones.** mRNA levels of stable INS1E cell lines were detected by real time PCR. The data were normalized to TBP1 mRNA and presented relative to control cells (n=6). Results are expressed as mean ± SEM.

**Figure.S3: Mitochondrial content in stable INS1E clones.** Mitochondrial content was estimated as the ratio between copy numbers of mtDNA (cytochrome c oxidase 1, COI) *versus* nuclear DNA (CCAAT-enhancer-binding proteins-β, C/EBP-β) (n=4). Results are expressed as mean ± SEM.

**Figure.S4: Protein levels of mitochondrial respiratory chain subunits stable INS1E clones.** Representative immunoblotting revealing protein levels of the mitochondrial complex subunits (I, II, III, IV, V) of stable INS1E clones using a monoclonal anti-total OXPHOS antibody cocktail. Actin was used as a control of protein quantity (n=7).

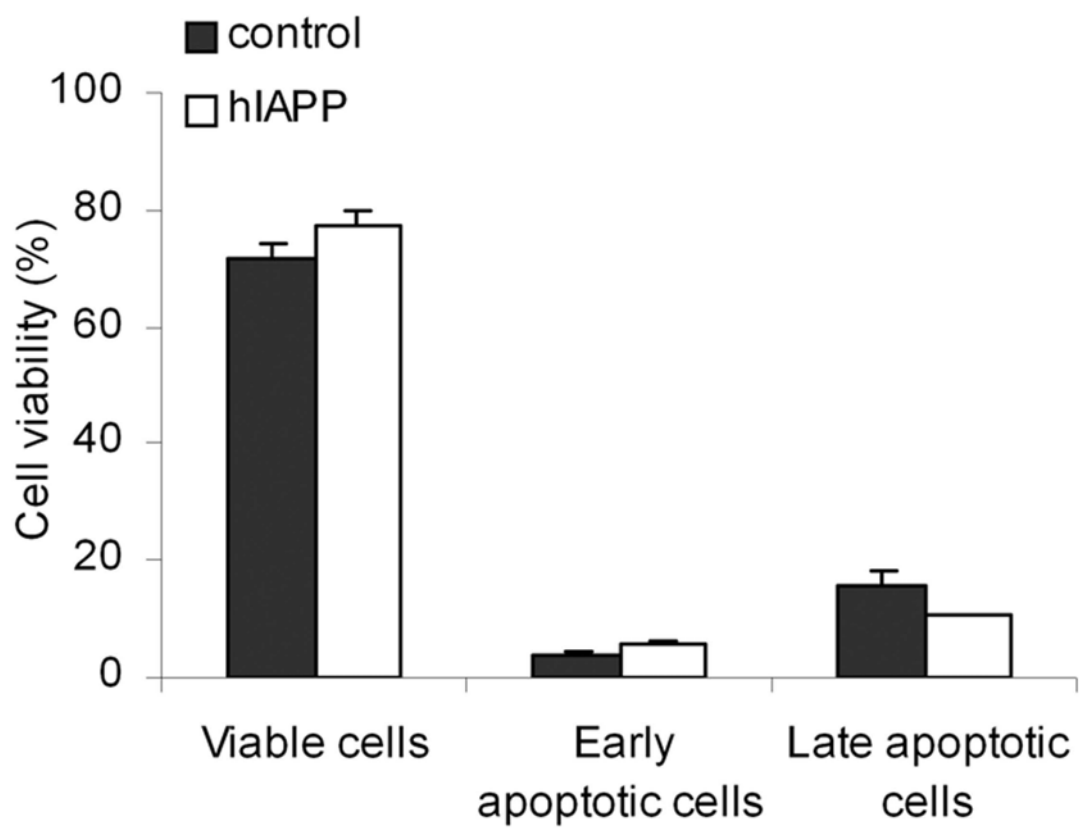

Fig. S1

|                         | genes          | control   | hiAPP     |
|-------------------------|----------------|-----------|-----------|
| Mitochondria biogenesis | <i>TFAM</i>    | 1.00±0.13 | 0.92±0.24 |
|                         | <i>NRF1</i>    | 1.00±0.27 | 0.89±0.07 |
| KATP channel subunits   | <i>Kir 6.2</i> | 1.00±0.09 | 1.09±0.15 |
|                         | <i>Sur1</i>    | 1.00±0.09 | 0.83±0.07 |
| ER stress               | <i>Bip</i>     | 1.00±0.15 | 0.87±0.16 |
|                         | <i>CHOP</i>    | 1.00±0.24 | 0.85±0.22 |

Fig. S2

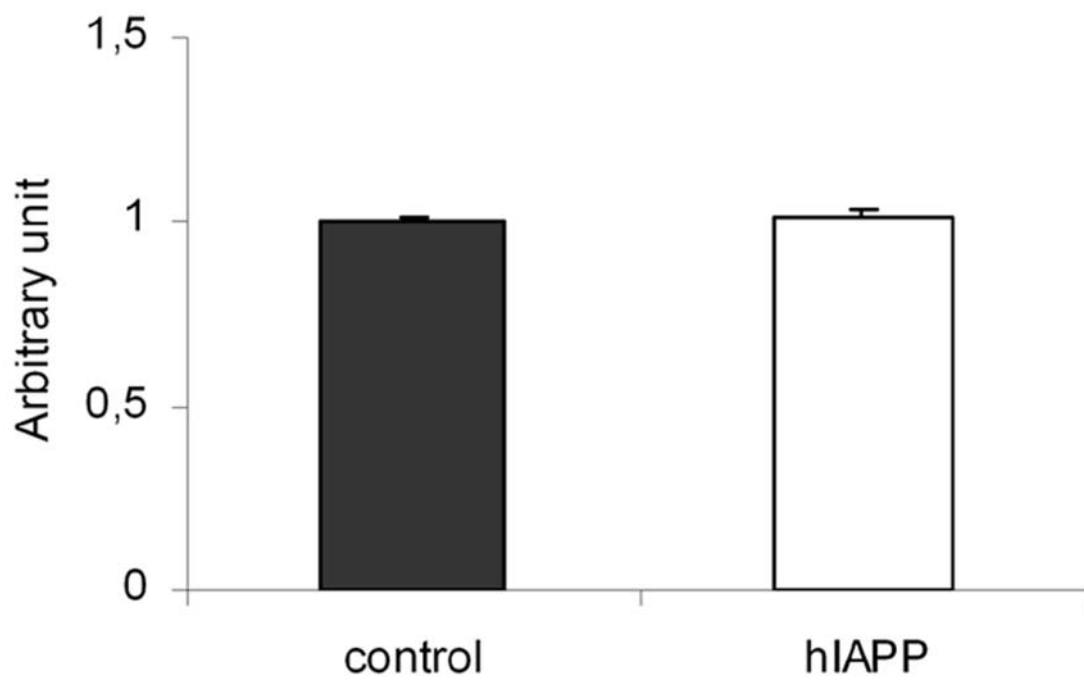

Fig. S3

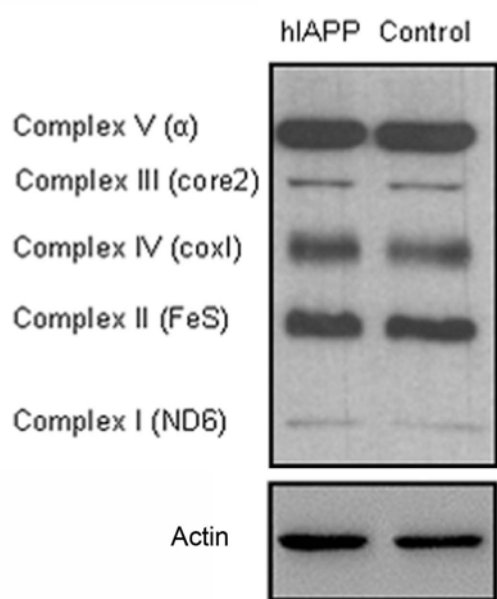

Fig. S4
